# Supplementary material for: Flower-like mesoporous silica: a bifunctionalized catalyst for rhodium-catalyzed asymmetric transfer hydrogenation of aromatic ketones in aqueous medium
Source: Royal Society of Chemistry journal article supplement (doi:10.1039/c3gc40547h), 2013-01-01

Supporting Information for

**Flowerlike Mesoporous Silica: A Bifunctionalized Catalyst for  
Rhodium-Catalyzed Asymmetric Transfer Hydrogenation of Aromatic Ketones  
in Aqueous Medium**

Fei Gao, Ronghua Jin, Dacheng Zhang, Quanxi Liang, Qunqun Ye, Guohua Liu\*

Key Laboratory of Resource Chemistry of Ministry of Education, Shanghai Key Laboratory of  
Rare Earth Functional Materials, Shanghai Normal University, Shanghai 200234, P. R. China

|              | <b>Content</b>                                                                             | <b>Page</b> |
|--------------|--------------------------------------------------------------------------------------------|-------------|
| Experimental | General and characterization the catalyst.                                                 | S2          |
| Figure S1    | The FT-IR spectra of the pure FMS material and <b>2-3</b>                                  | S3          |
| Figure S2    | The TG/DTA curves of the pure FMS material and <b>2-3</b> .                                | S3          |
| Figure S3    | The low-angle and wide-angle powder XRD patterns of the catalysts <b>3</b> .               | S6          |
| Table 1      | Asymmetric transfer hydrogenation of aromatic ketones.                                     | S7          |
| Figure S4    | Asymmetric transfer hydrogenation of aromatic ketones.                                     | S8          |
| Table 2      | Reusability of the catalyst <b>3</b> for asymmetric transfer hydrogenation of acetophenone | S15         |
| Figure S5    | Reusability of the catalyst <b>3</b> for asymmetric transfer hydrogenation of acetophenone | S15         |

## Experimental

### 1. General

All experiments, which were sensitive to moisture or air, were carried out under an Ar atmosphere using standard Schlenk techniques. 2-(4-chlorosulfonylphenyl)ethyltrimethoxysilane, 4-(methylphenylsulfonyl)-1,2-diphenylethylenediamine [(*S,S*)-TsDPEN], the surfactant cetyltrimethylammonium bromide (CTAB), tetraethoxysilane (TEOS) and [Cp\**RhCl*<sub>2</sub>]<sub>2</sub> were purchased from Sigma-Aldrich Company Ltd. and used as received. Compound [(*S,S*)-DPEN-SO<sub>2</sub>Ph(CH<sub>2</sub>)<sub>2</sub>Si(OMe)<sub>3</sub>] and the pure FMS material was synthesized according to the reported literature [*Chem. Commun.* **2011**, 47, 4087]. The products were analyzed by using a HPLC with a UV-Vis detector using a Daicel AD-H or OD-H chiralcel columns (□ Φ 0.46 x 25 cm).

### 2. Characterization

Rh loading amount in the catalyst was analyzed using an inductively coupled plasma optical emission spectrometer (ICP, Varian VISTA-MPX). Fourier transform infrared (FTIR) spectra were collected on a Nicolet Magna 550 spectrometer using KBr method. X-ray powder diffraction (XRD) was carried out on a Rigaku D/Max-RB diffractometer with CuK $\alpha$  radiation. Scanning electron microscopy (SEM) images were obtained using a JEOL JSM-6380LV microscope operating at 20 kV. Transmission electron microscopy (TEM) images were performed on a JEOL JEM2010 electron microscope at an acceleration voltage of 220 kV. X-ray photoelectron spectroscopy (XPS) measurements were performed on a Perkin-Elmer PHI 5000C ESCA system. All the binding energies were calibrated by using the contaminant carbon (C<sub>1s</sub> = 284.6 eV) as a reference. Thermal gravimetric analysis (TGA) was performed with a Perkin-Elmer Pyris Diamond TG analyzer under air atmosphere with a heating ramp of 5 K/min. Solid-state <sup>13</sup>C (100.5 MHz) and <sup>29</sup>Si (79.4 MHz) CP MAS NMR were obtained on a Bruker DRX-400 spectrometer.

**Figure S1.** The FT-IR spectra of the pure FMS material and 2-3.

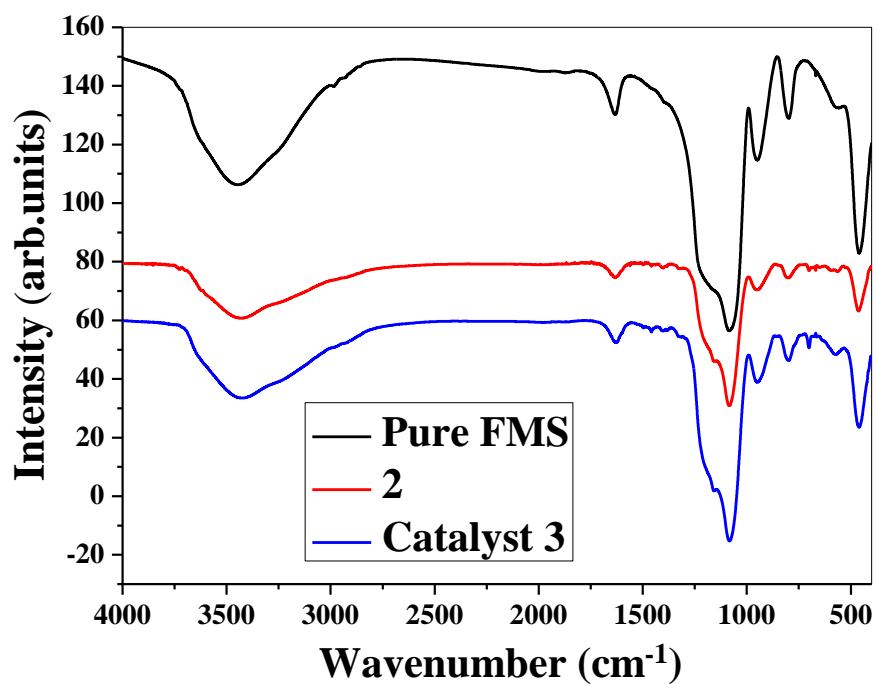

**Figure S2.** The TG/DTA curves of the pure FMS material and 2.

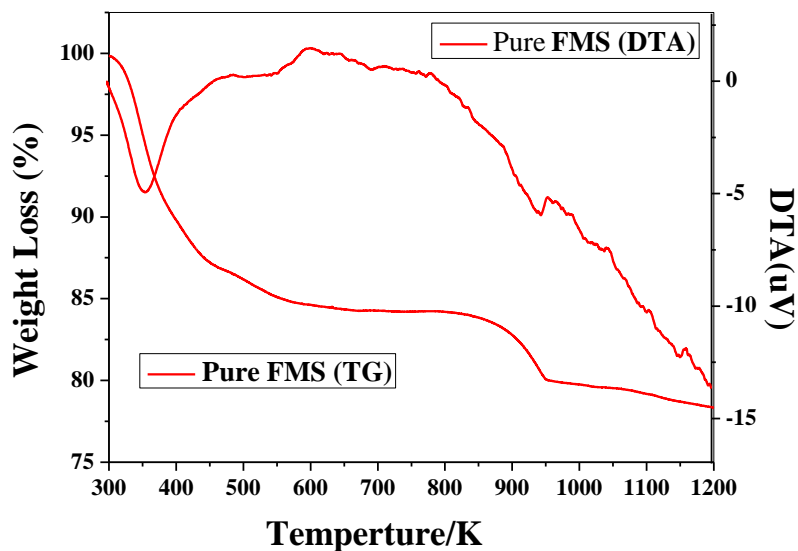

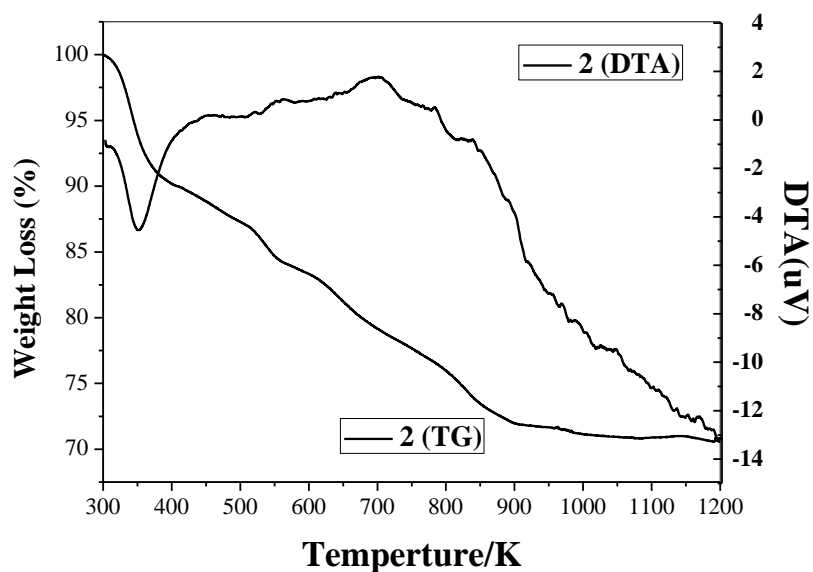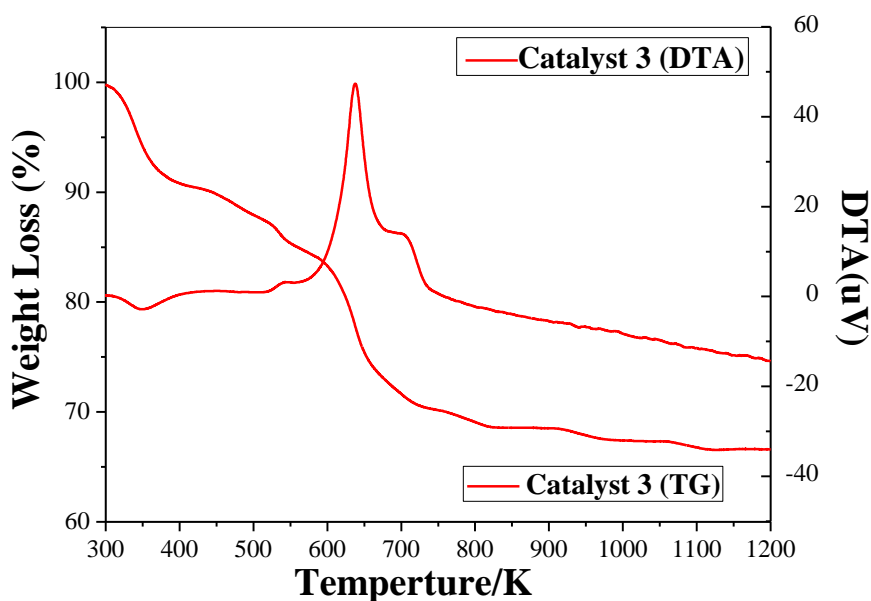

**Explanation:** The TG/DTA curve of the pure FMS and **2-3** were treated in the air. An endothermic peak around 355K with weight loss of 12.9% could be attributed to the release of physical adsorption water while the comprehensive endothermic peaks around 450-1120K with weight loss of 8.4% could be assigned to the release of the residual CTAB surfactant (cetyltrimethylammonium chloride) within FMS (V. Cauda, A. Schlossbauer, J. Kecht, A. Zürner, T. Bein, *Am. Chem. Soc.*, 2009, **131**, 11361). Thus, the totally weight loss of the residual CTAC surfactant was 8.4% in 87.1% FMS materials when eliminated the contribution of water, meaning the **9.6% weight**

**loss of the residual CTAC surfactant per 100% materials.**

Similarly, for TsDPEN-functionalized-FFMS (**2**), a similar endothermic peak around 355K with weight loss of 11.3% could be attributed to the release of physical adsorption water while the comprehensive endothermic peaks around 450-1120K with weight loss of 17.9% in 88.7% TsDPEN-functionalized-FFMS (**2**) could be assigned to the oxidation of organic molecules (including TsDPEN fragments and part of the residual CTAC surfactant), meaning that the totally weight loss of organic moieties was 20.2% per 100% materials.

Similarly, for catalyst **3**, a similar endothermic peak around 355K with weight loss of 10.2% in the heterogeneous catalyst **3** were due to the release of physical adsorption water. It was worth mentioning that two new typical exothermic peaks were combined into one complicated exothermic peak between 450-1120K with weight loss of 23.3% in 89.8% catalyst **3** could be assigned to the oxidation of organic molecules (including Cp\*RhTsDPEN complexes and part of the residual CTAC surfactant), meaning that the totally weight loss of organic moieties was 25.9% per 100% materials.

When compared the pure FMS with **2**, the true weight loss of TsDPEN organic molecules was 10.6% (20.2-9.6) per 100% materials, meaning that mole amounts is 0.28 (10.4%/380) mmol per gram material **2**. Similarly, when compared the pure FMS material and **2** to the catalyst **3**, the true weight loss of [Cp\*Cl<sub>2</sub>] organic moiety was 5.7% (25.9-20.2) per 100% materials, meaning that mole amounts is 0.28 (5.7%/205) mmol per gram catalyst **3**. **This datum is nearly consistent with 27.18 mg (0.26 mmol) of Rh loadings per gram catalyst detected by ICP analysis.**

**Figure 3.** Low-angle and wide-angle powder XRD patterns of the catalysts **3**.

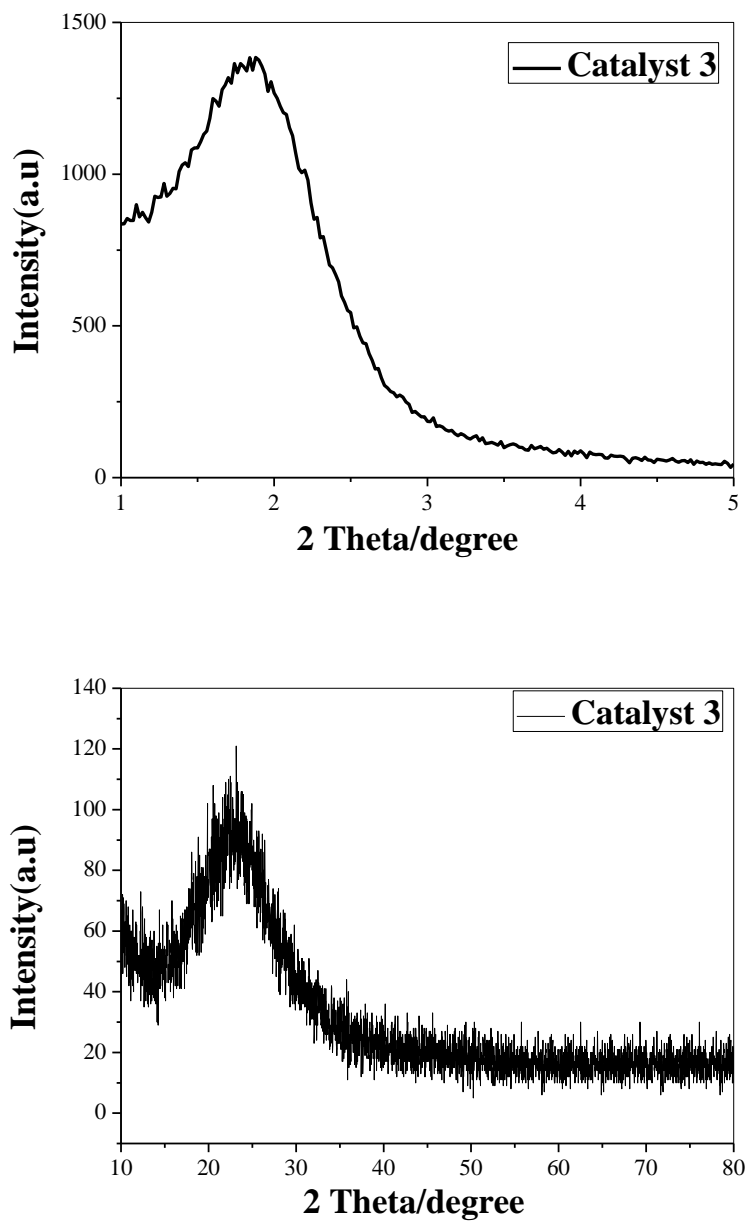

**Table 1.** Asymmetric transfer hydrogenation of aromatic ketones.<sup>a</sup>

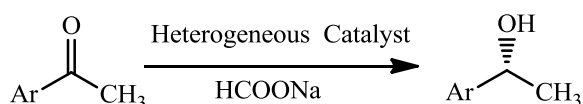

| Entry | R                    | Time (h) | Conv.[%] <sup>b</sup> | ee [%] <sup>b</sup>  |
|-------|----------------------|----------|-----------------------|----------------------|
| 1     | Ph                   | 0.5      | >99(88)               | 97 (96) <sup>c</sup> |
| 2     | Ph                   | 4.0      | 86                    | 97 <sup>d</sup>      |
| 3     | Ph                   | 0.5      | 97                    | 95 <sup>e</sup>      |
| 4     | Ph                   | 0.5      | >99                   | 96 <sup>f</sup>      |
| 5     | 4-FPh                | 0.5      | >99                   | 92                   |
| 6     | 4-ClPh               | 0.5      | >99                   | 94                   |
| 7     | 4-BrPh               | 0.5      | >99                   | 94                   |
| 8     | 3-BrPh               | 0.5      | >99                   | 97                   |
| 9     | 4-MePh               | 2.0      | >99                   | 94                   |
| 10    | 4-OMePh              | 4.0      | 97                    | 94                   |
| 11    | 3-OMePh              | 0.5      | >99                   | 95                   |
| 12    | 4-CNPh               | 0.5      | >99                   | 89                   |
| 13    | 4-CF <sub>3</sub> Ph | 0.5      | >99                   | 94                   |
| 14    | 4-NO <sub>2</sub> Ph | 0.5      | >99                   | 86                   |
| 15    | 1-pyrenyl            | 24.0     | 46 (79 <sup>g</sup> ) | 55(81 <sup>g</sup> ) |

<sup>a</sup>) Reaction conditions: catalysts (7.58 mg, 2.00 μmol of Rh based on ICP analysis), HCO<sub>2</sub>Na (0.68 g, 10.0 mmol), ketone (2.0 mmol) and 2.0 mL water, reaction temperature (40 °C), reaction time (0.5-5.0 h). <sup>b</sup>) Determined by chiral GC or HPLC analysis (see SI in Figure S5). <sup>c</sup>) Data were obtained using the homogeneous Cp\*RhTsDPEN catalyst without additive of Bu<sub>4</sub>NBr in aqueous medium. <sup>d</sup>) Data was obtained with 0.2% mol of catalyst. <sup>e</sup>) Data were obtained using TsDPEN-functionalized-FFMS (**2**) plus (Cp\*RhCl<sub>2</sub>)<sub>2</sub> as a catalyst. <sup>f</sup>) Data were obtained using the pure FMS material plus Cp\*RhTsDPEN as a catalyst. <sup>g</sup>) Data were obtained using the flowerlike silica prepared by *via* tetramethylammonium bromide (TAB) as a structure-directed template reagent.

**Translation of Chinese to English is as follows:**

| Component Name |     | RetTime [min] | Height | Area      | Concentration | Resolution half-width | Theoretical Plate | Tailing factor |      |
|----------------|-----|---------------|--------|-----------|---------------|-----------------------|-------------------|----------------|------|
| Peak           | ↑   | ↑             | ↑      | ↑         | ↑             | ↑                     | ↑                 | ↑              |      |
| ID号            | 组分名 | 保留时间(分钟)      | 峰高(微伏) | 峰面积(微伏*秒) | 浓度            | 半峰宽(秒)                | 分离度               | 理论塔板           | 拖尾因子 |
| 1              |     | 18.360        | 29     | 100.0     | 3.0723        | 3.45                  | 0.00              | 565022.82      | 1.05 |
| 2              |     | 18.720        | 535    | 3154.9    | 96.9277       | 5.90                  | 2.72              | 200851.56      | 2.02 |
|                | 总计: |               | Σ=564  | Σ=3254.9  | Σ=100.0000    |                       |                   |                |      |

Figure S4. Asymmetric transfer hydrogenation of the catalyst 3 [The catalytic activity and enantiomeric excess were determined by chiral GC using a Supelco  $\beta$ -Dex 120 chiral column (30 m $\times$ 0.25 mm (i.d.), 0.25  $\mu$ m film)].

Asymmetric transfer hydrogenation of acetophenone.

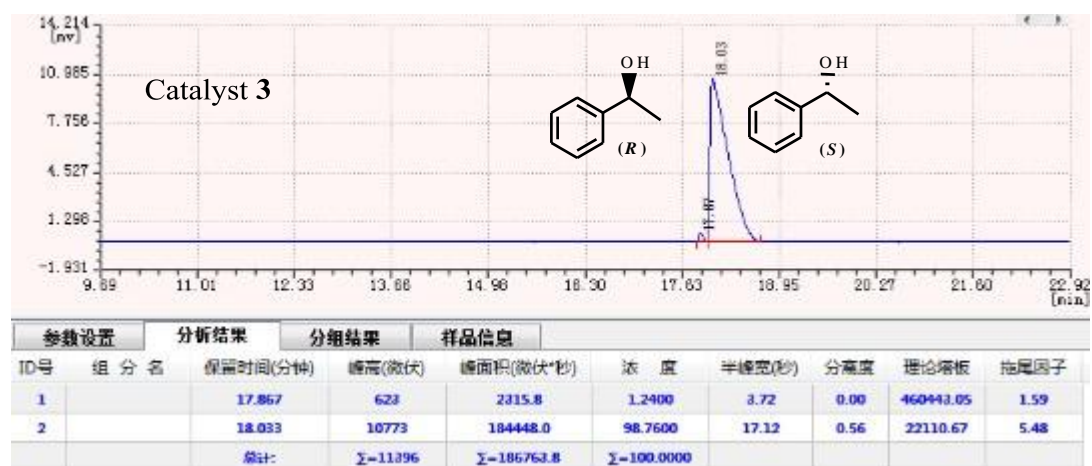

Asymmetric transfer hydrogenation of acetophenone with the substrate/catalyst =500.

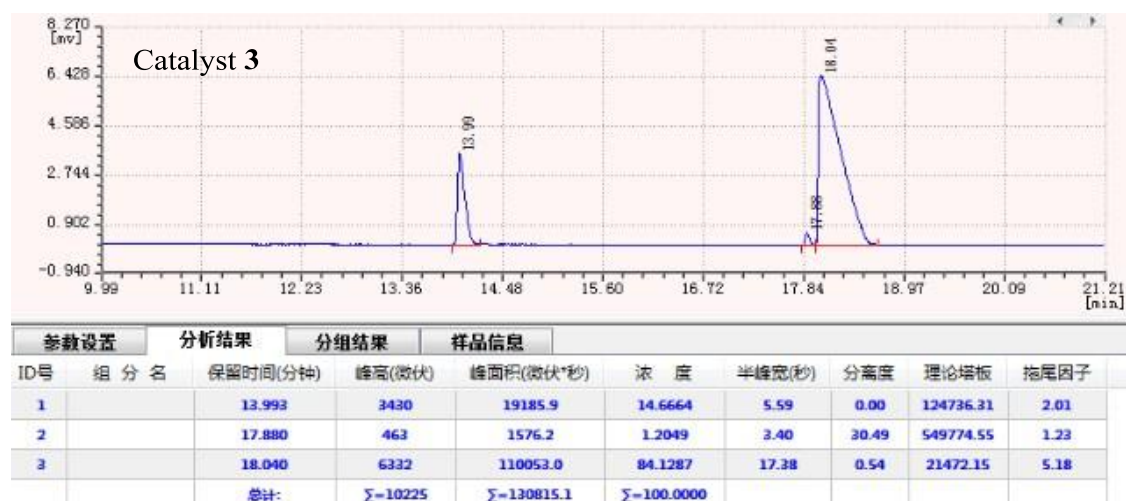



Asymmetric transfer hydrogenation of acetophenone using TsDPEN-functionalized-FFMS (2) plus  $(\text{Cp}^*\text{RhCl}_2)_2$  as a catalyst

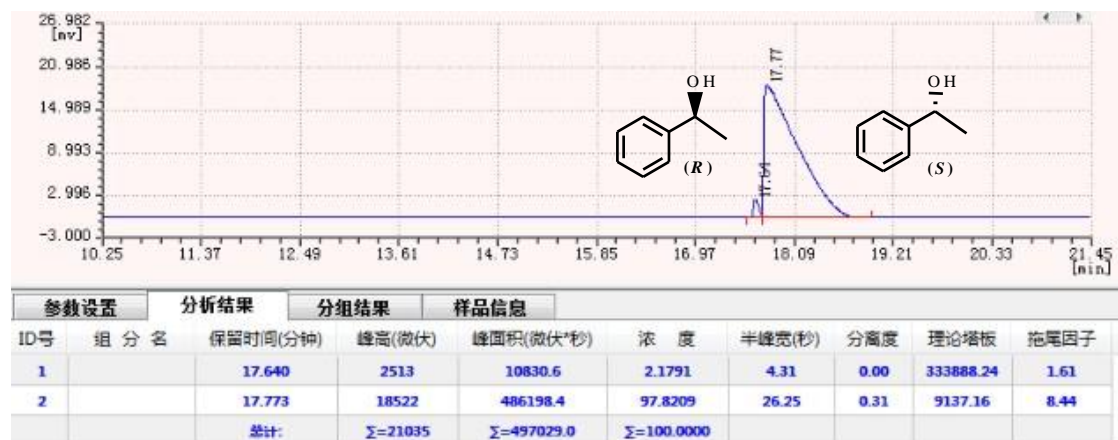

Asymmetric transfer hydrogenation of acetophenone using the pure FMS material plus RhTsDPEN as a catalyst.

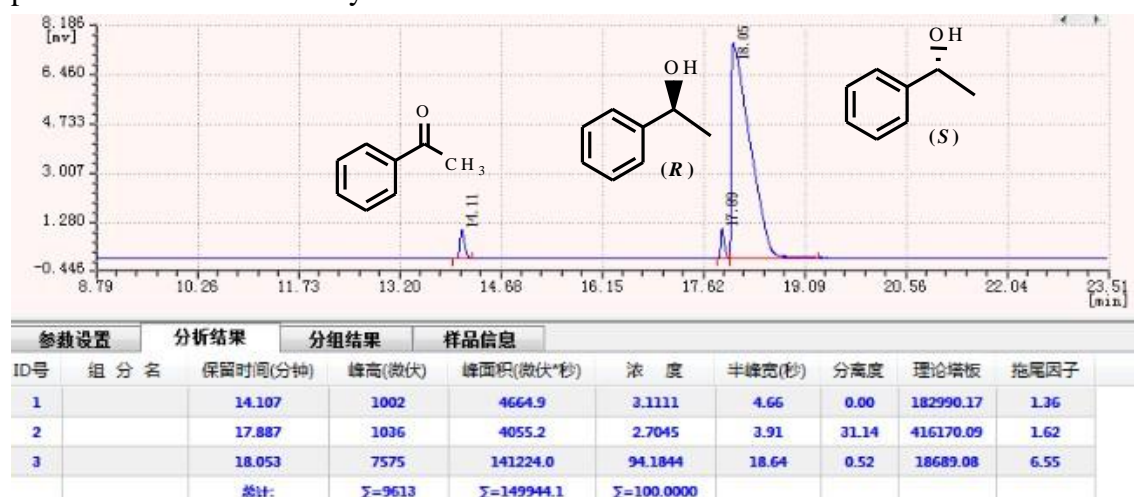

Asymmetric transfer hydrogenation of 4-fluoroacetophenone.

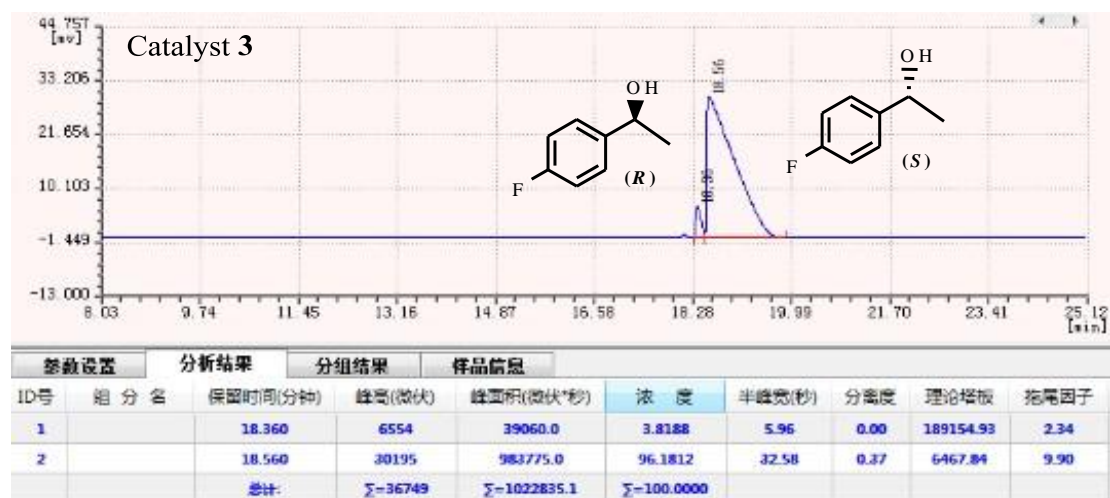

Asymmetric transfer hydrogenation of 4-chloroacetophenone.

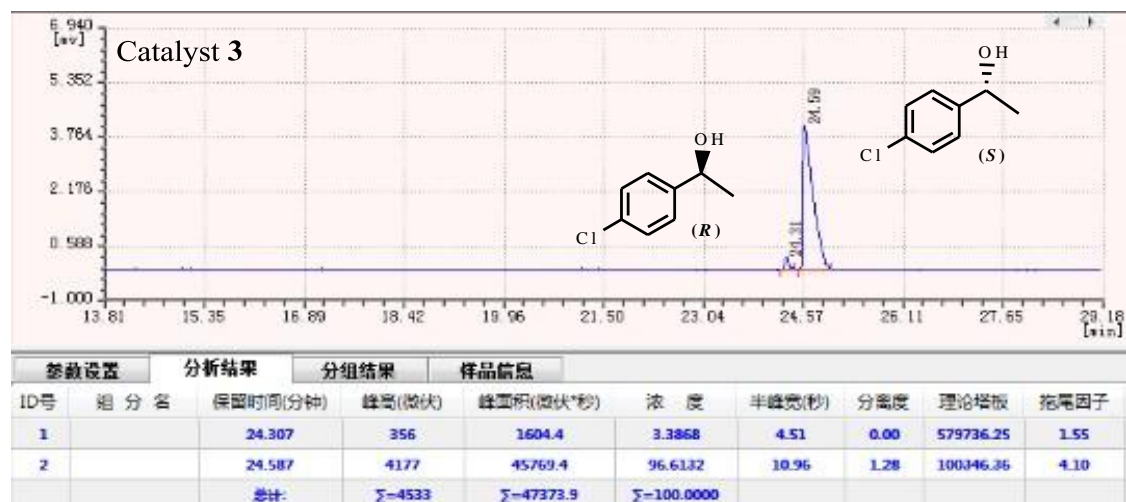

Asymmetric transfer hydrogenation of 4-bromoacetophenone.

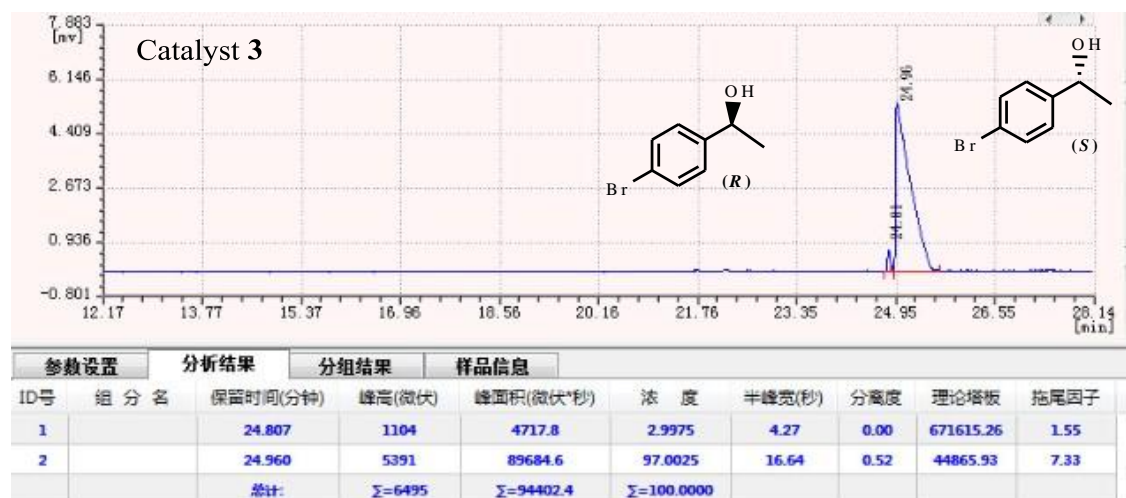

Asymmetric transfer hydrogenation of 3-bromoacetophenone.

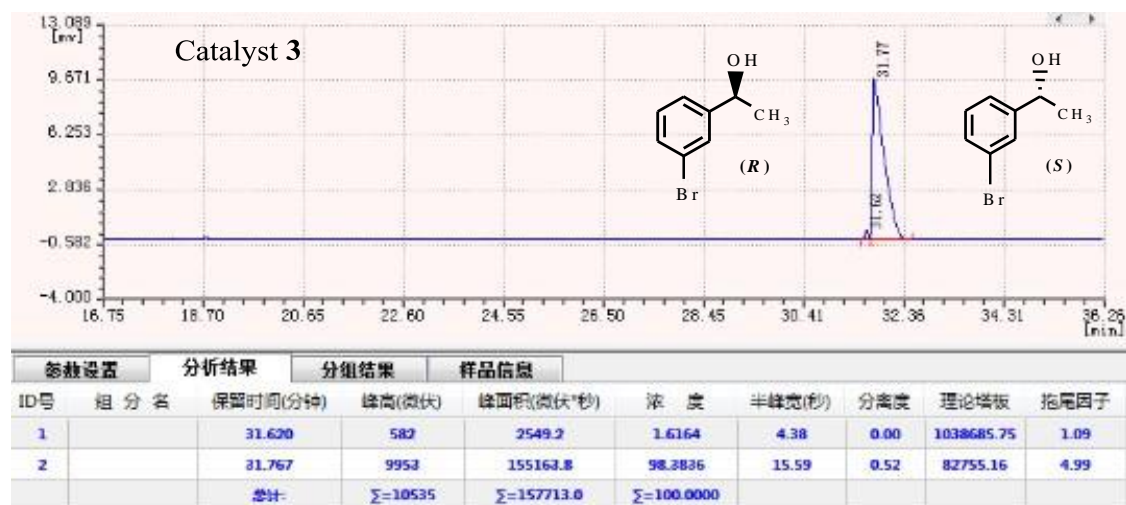

Asymmetric transfer hydrogenation of 4-methylacetophenone.

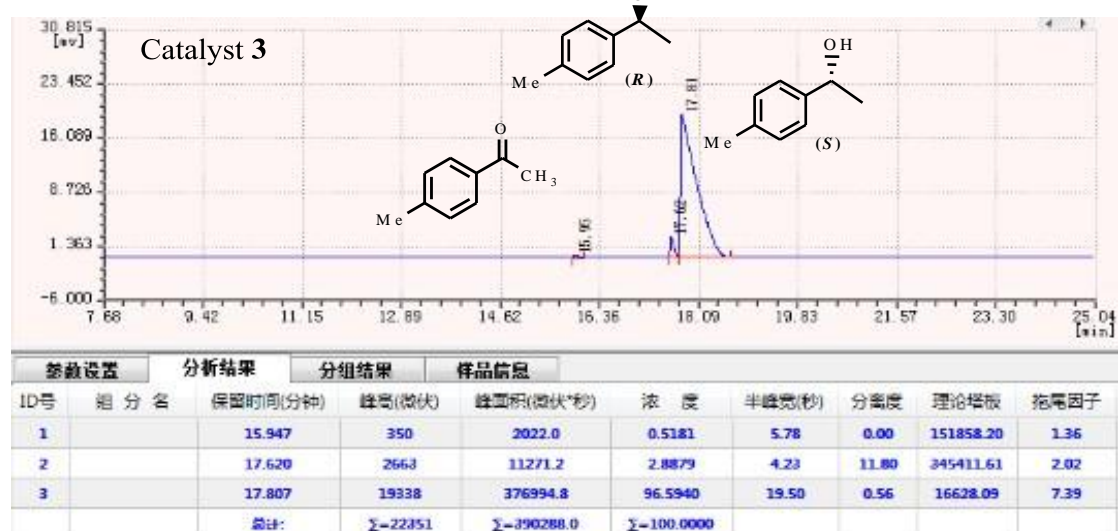

Asymmetric transfer hydrogenation of 4-methoxyacetophenone.

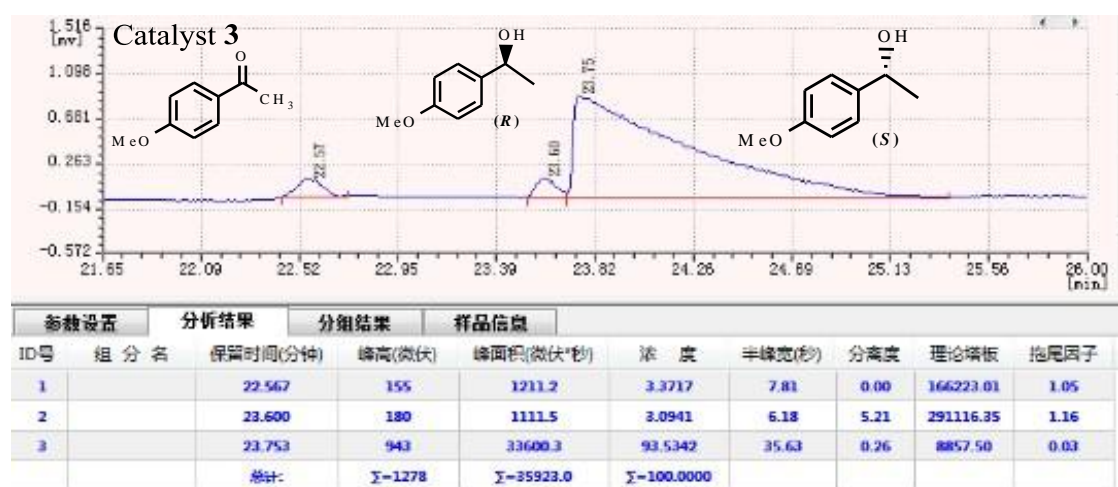



Asymmetric transfer hydrogenation of 3-methoxyacetophenone.

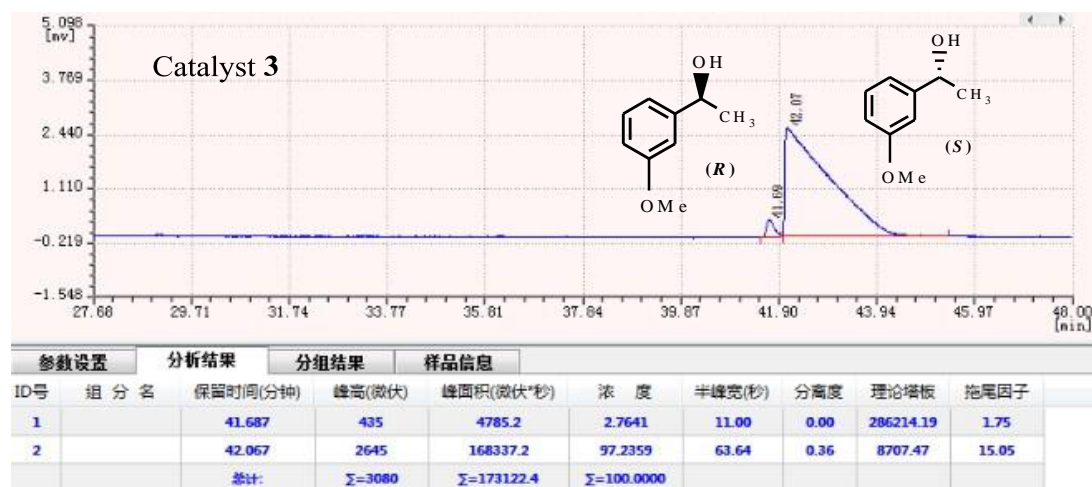

Asymmetric transfer hydrogenation of 4-cyanoacetophenone.

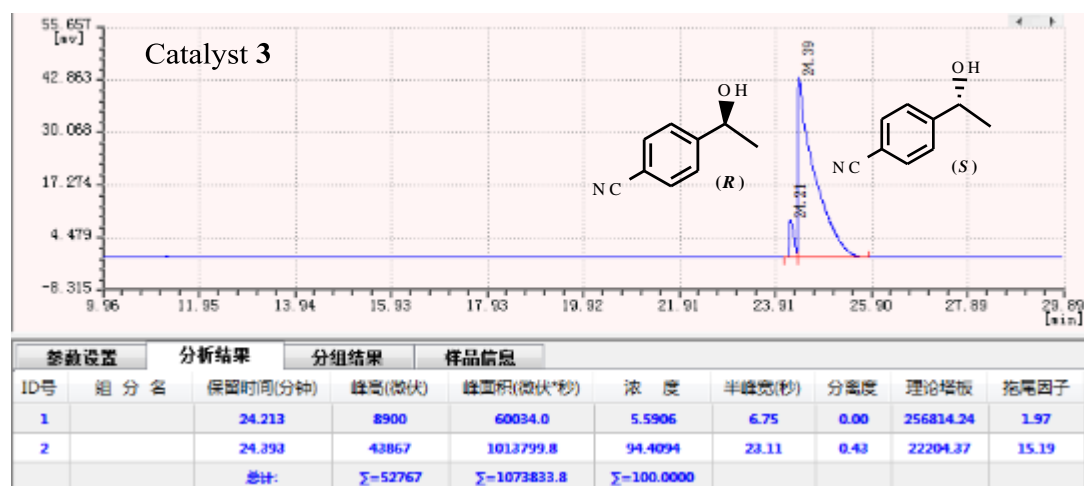

Asymmetric transfer hydrogenation of 4-nitroacetophenone.

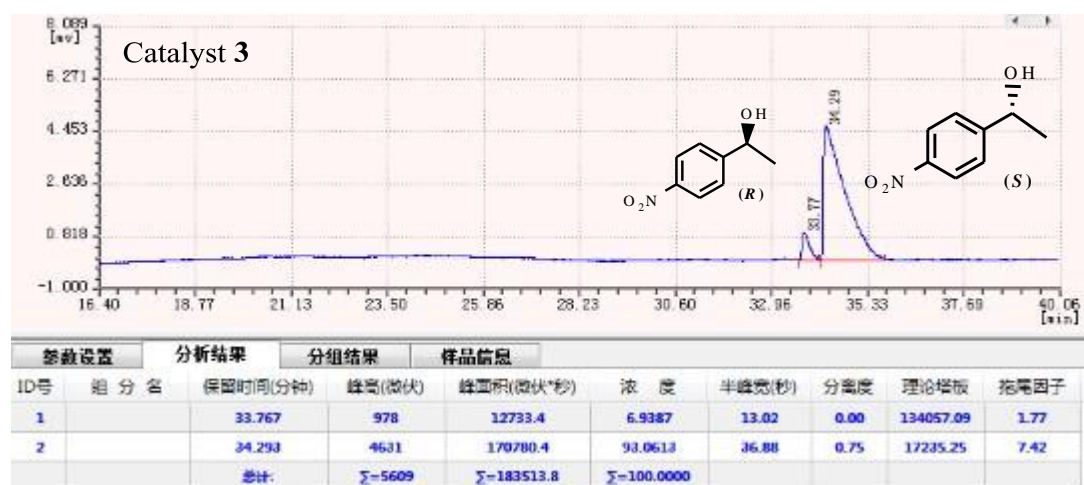

Asymmetric transfer hydrogenation of 4-trifluoromethylacetophenone.

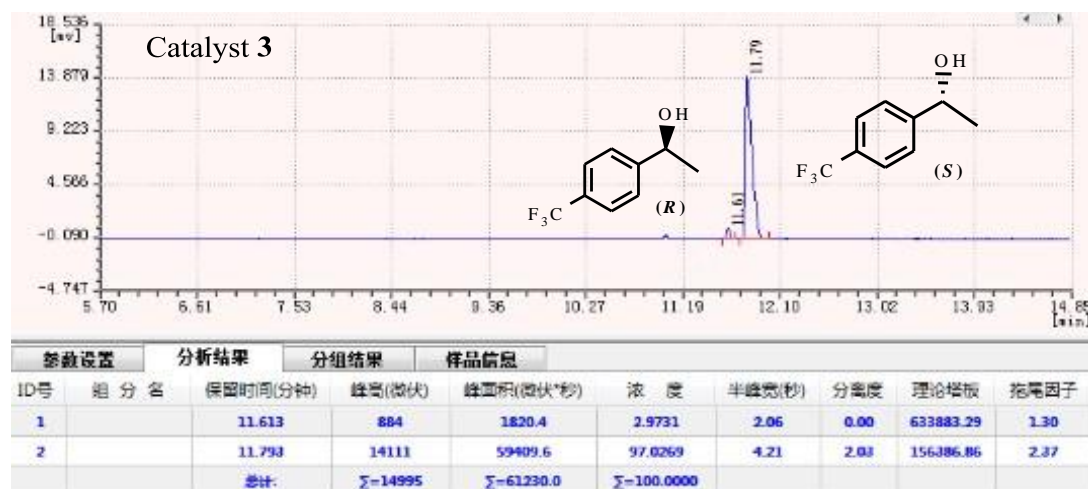

Asymmetric transfer hydrogenation of 1-acetylpyrene. (HPLC analysis with a UV-Vis detector using a Daicel OD-H chiralcel columns ( $\Phi 0.46 \times 25$  cm), Hexane/2-propanol 97:3, 1 mL/min, 254 nm, 40 °C)

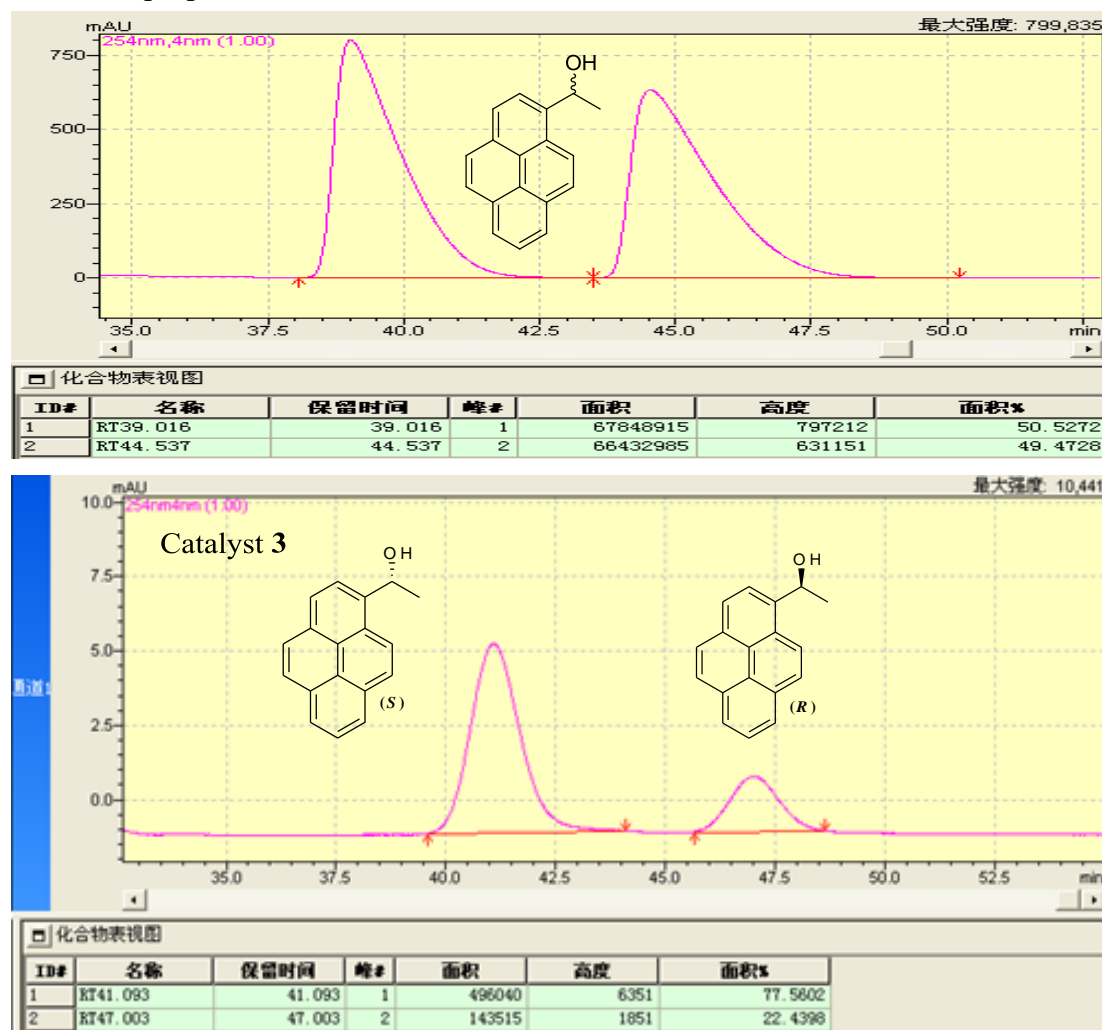

Asymmetric transfer hydrogenation of 1-acetylpyrene, in which the catalyst prepared using the tetramethylammonium bromide (TAB) instead of cetyltrimethylammonium bromide (CTAB) as a structure-directed template reagent.

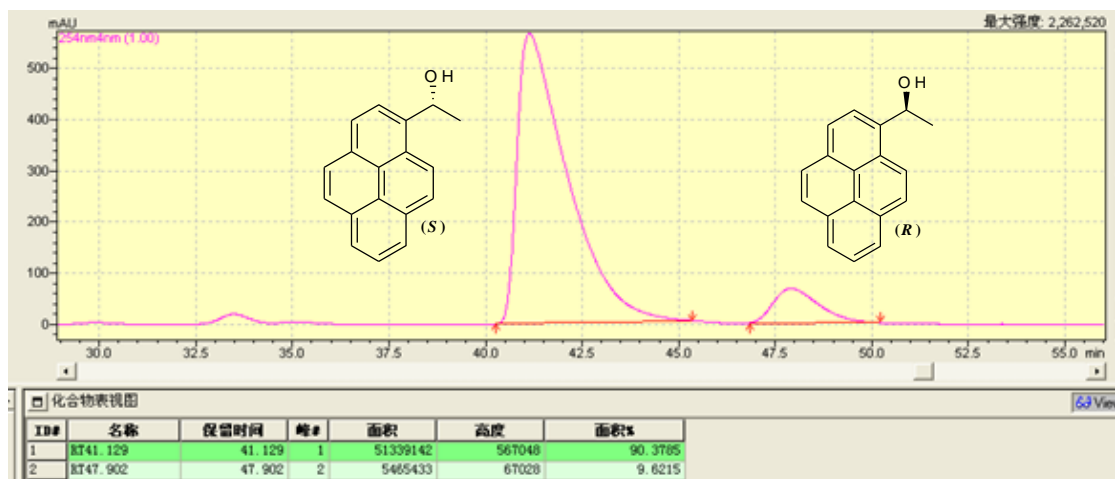

Asymmetric transfer hydrogenation of 1-acetylpyrene using the homogeneous Cp\*RhTsDPEN as a catalyst. Conversion: 81%, ee: 83%

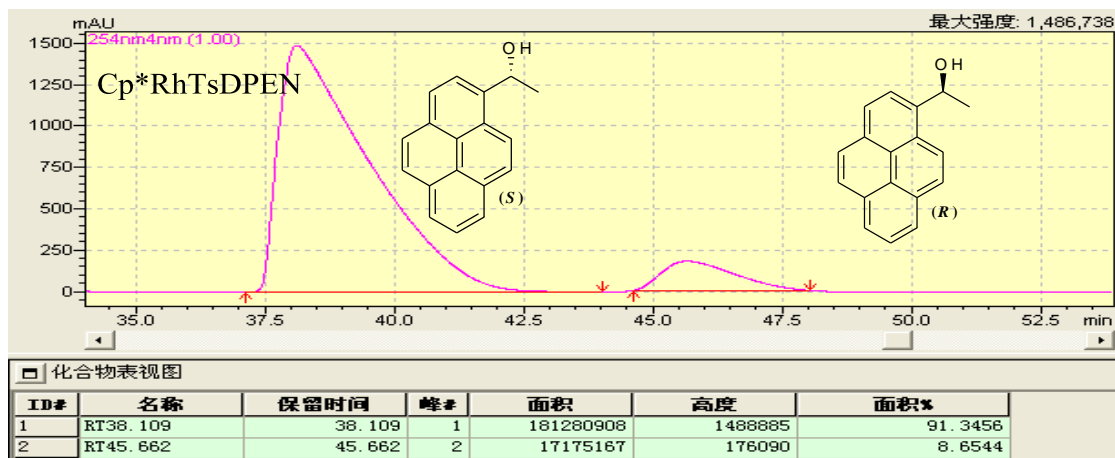

**Table 2.** Reusability of the catalyst **3** for asymmetric transfer hydrogenation of acetophenone.<sup>a</sup>

| Run time  | 1    | 2    | 3    | 4    | 5    | 6    | 7    | 8    | 9    | 10   |
|-----------|------|------|------|------|------|------|------|------|------|------|
| Conv. [%] | 99.9 | 99.9 | 99.9 | 99.9 | 99.9 | 99.9 | 99.7 | 99.6 | 99.1 | 98.3 |
| ee [%]    | 97.5 | 97.5 | 97.5 | 97.4 | 97.4 | 97.0 | 97.4 | 97.2 | 97.0 | 96.0 |

<sup>a</sup>) Reaction conditions: catalyst (7.58 mg, 2.00 μmol of Rh based on ICP analysis), HCO<sub>2</sub>Na (0.68 g, 10.0 mmol), ketone (2.0 mmol) and 2.0 mL water, reaction temperature (40 °C), reaction time (0.5-4.0 h).

**Figure S5.** Reusability of the catalyst **3** for asymmetric transfer hydrogenation of acetophenone.

Recycle 1 of the catalyst **3** using acetophenone as a substrate.

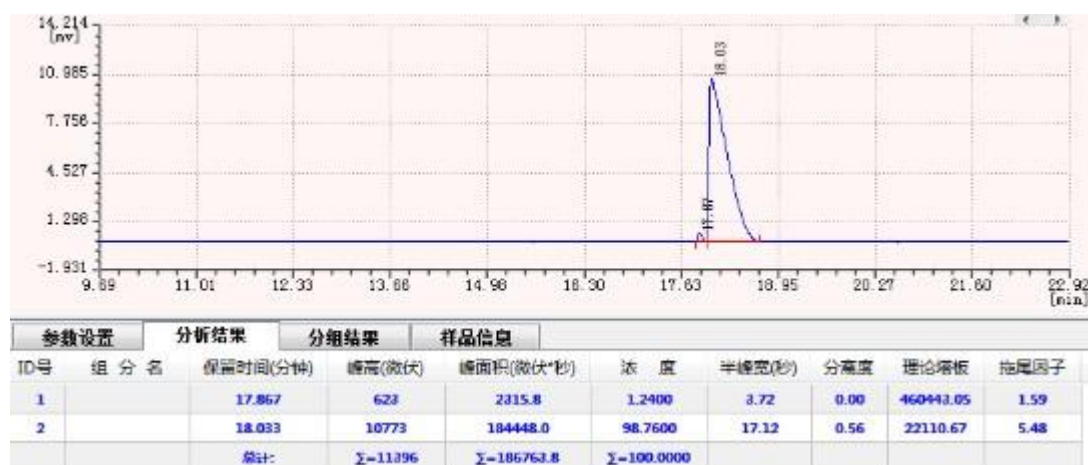

Recycle 2 of the catalyst **3** using acetophenone as a substrate.

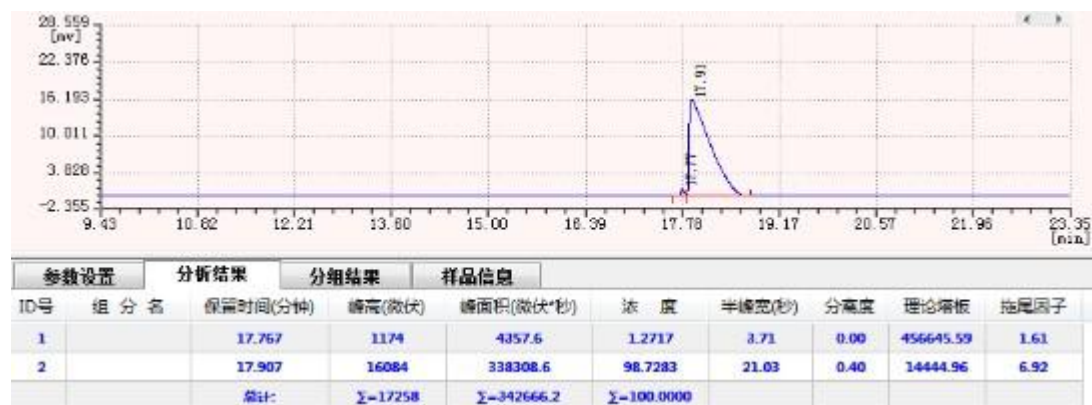



Recycle 3 of the catalyst **3** using acetophenone as a substrate.

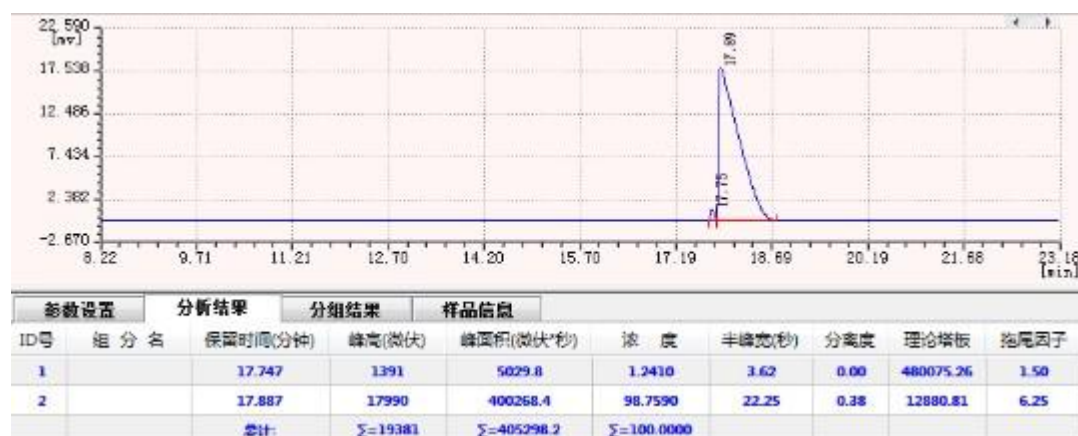

Recycle 4 of the catalyst **3** using acetophenone as a substrate.

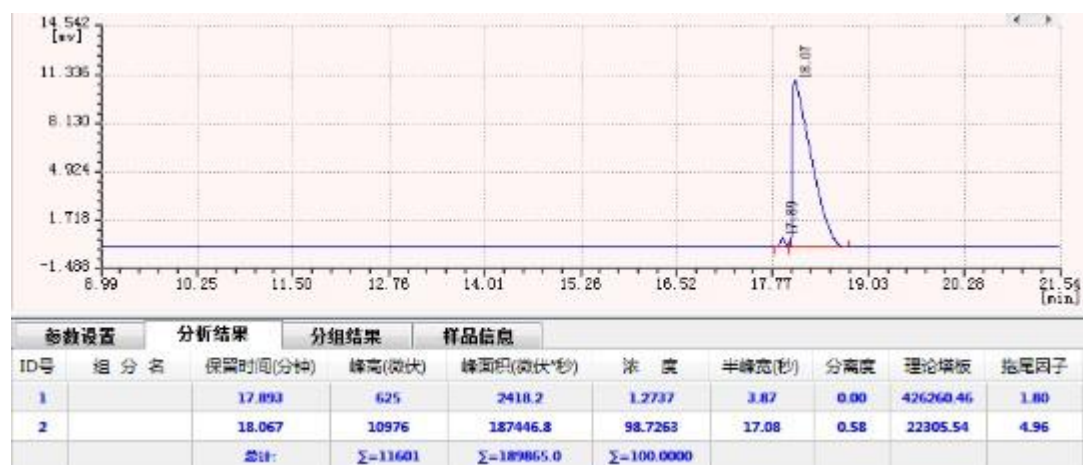

Recycle 5 of the catalyst **3** using acetophenone as a substrate.

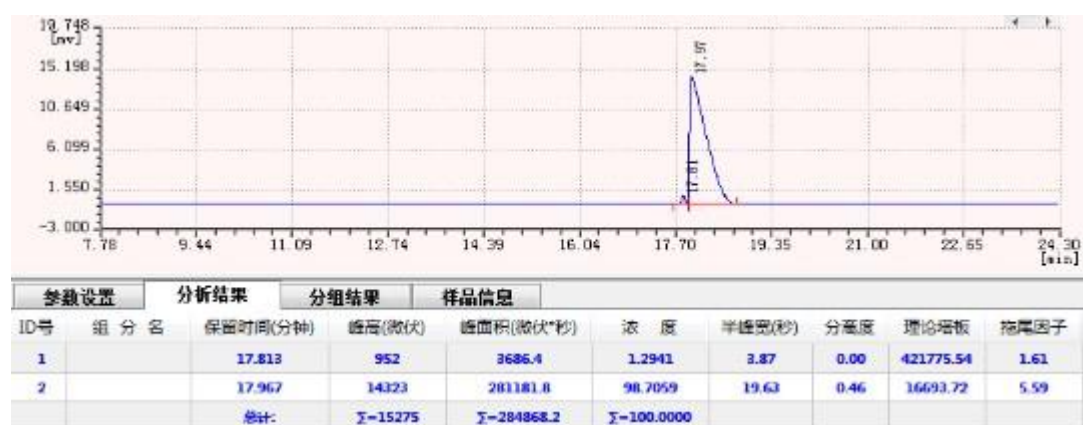



Recycle 6 of the catalyst **3** using acetophenone as a substrate.

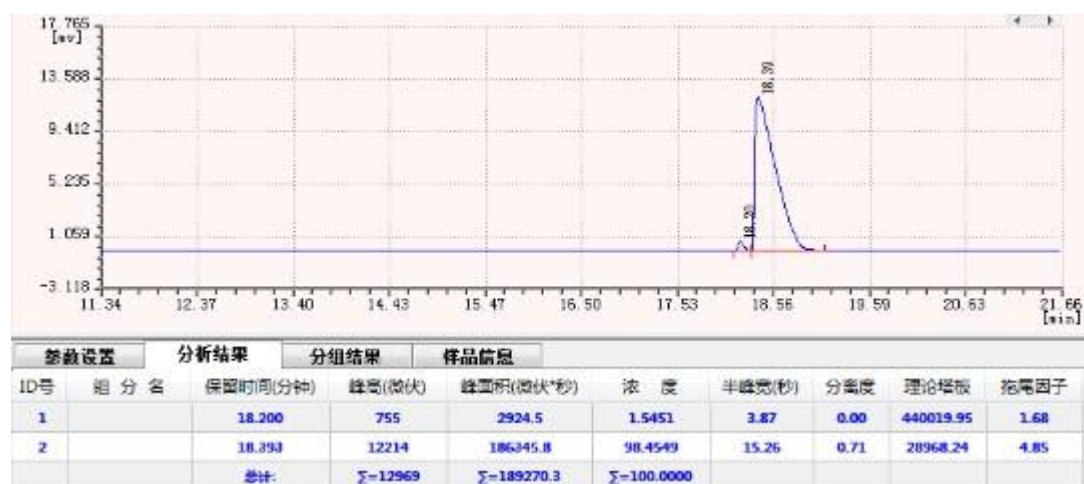

Recycle 7 of the catalyst **3** using acetophenone as a substrate.

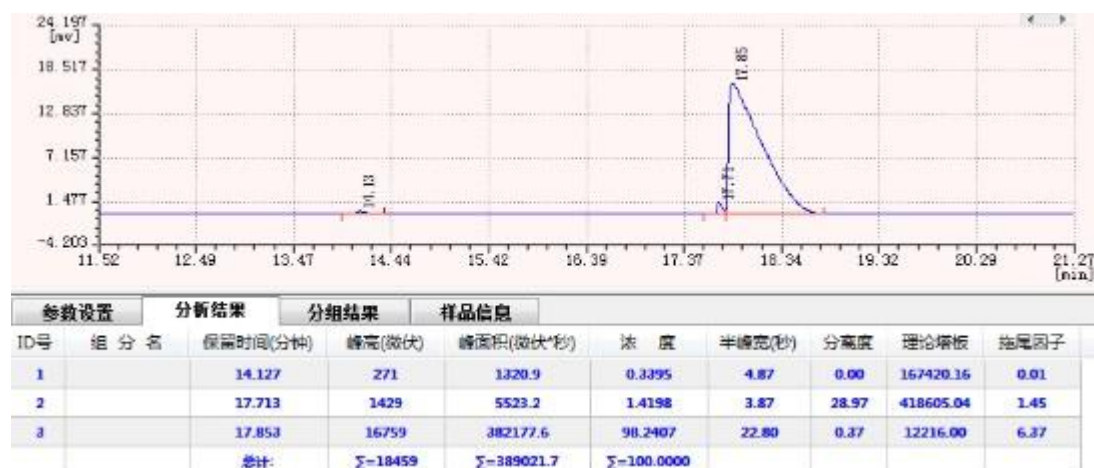

Recycle 8 of the catalyst **3** using acetophenone as a substrate.

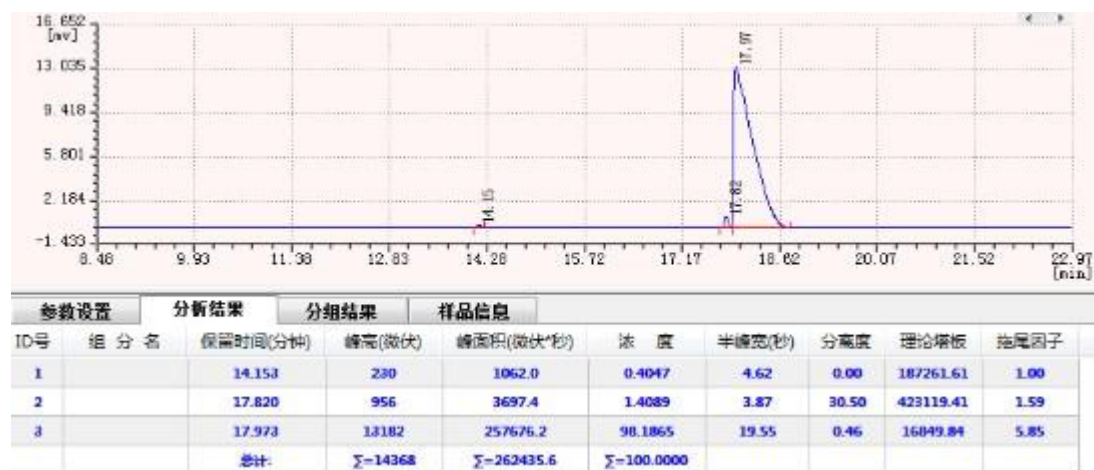

Recycle 9 of the catalyst **3** using acetophenone as a substrate.

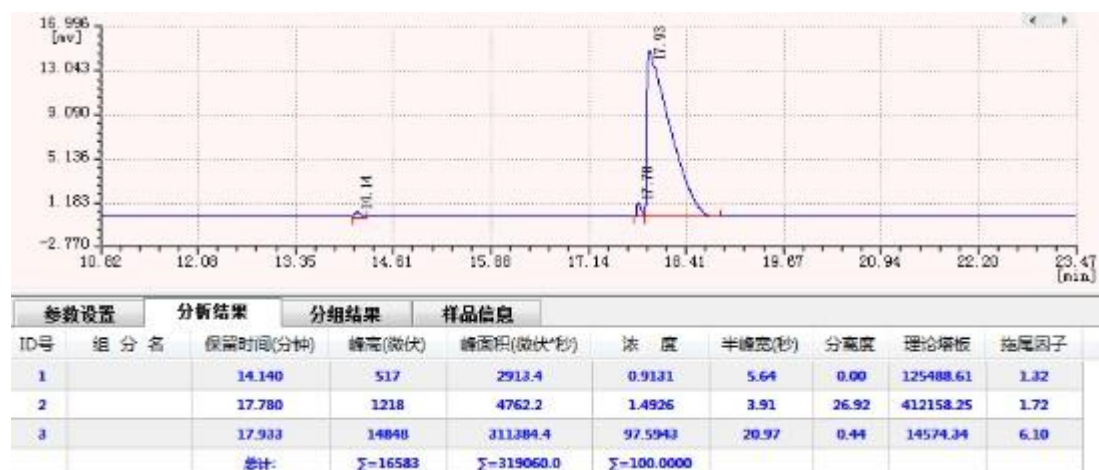

Recycle 10 of the catalyst **3** using acetophenone as a substrate.

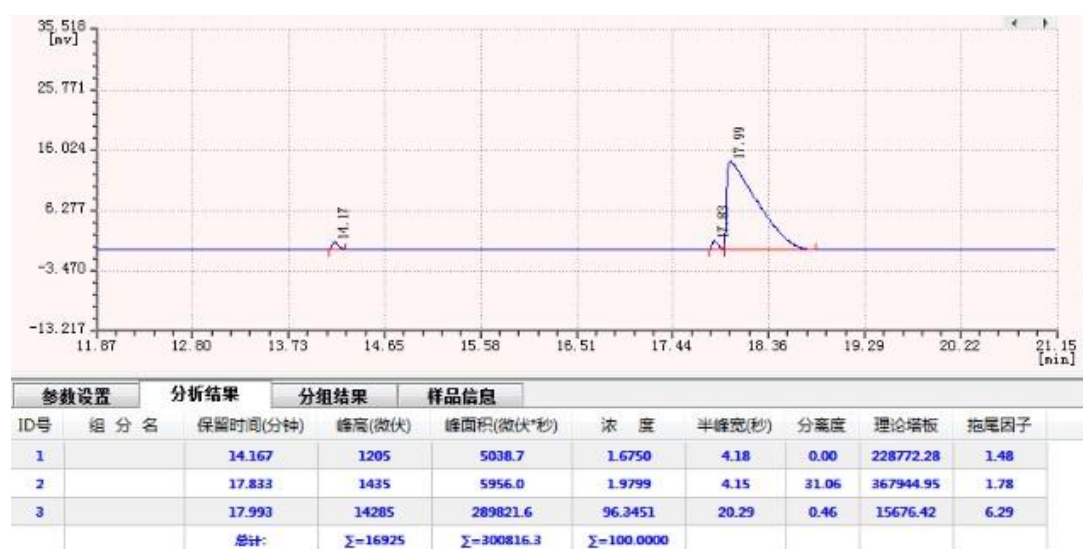

Supplement: c3gc40547h.pdf [file c3gc40547h.pdf]
